# Supplementary material for: Rapid synthesis of efficient Mo-based electrocatalyst for the hydrogen evolution reaction in alkaline seawater with 11.28% solar-to-hydrogen efficiency
Source: Royal Society of Chemistry journal article supplement (doi:10.1039/d3ta01522j), 2023-01-01
Supplement: d3ta01522j1.pdf [file d3ta01522j1.pdf]

## **SUPPLEMENTARY MATERIALS**

# **Rapid Synthesis of Efficient Mo-based Electrocatalyst for Hydrogen Evolution Reaction in Alkaline Seawater with 11.28% STH Efficiency**

Zhan Zhao<sup>a</sup>, Jianpeng Sun<sup>a</sup>, Zizhen Li<sup>a</sup>, Xiaofeng Xu<sup>c</sup>, Zisheng Zhang<sup>b</sup>,  
Chunhu Li<sup>a</sup>, Liang Wang<sup>a</sup> and Xiangchao Meng<sup>a\*</sup>

*<sup>a</sup>Key Laboratory of Marine Chemistry Theory and Technology (Ministry of Education), College of Chemistry & Chemical Engineering, Ocean University of China, Qingdao, 266100, China*

*<sup>b</sup>Department of Chemical and Biological Engineering, Faculty of Engineering, University of Ottawa, Ottawa, Ontario, K1N6N5, Canada.*

*<sup>c</sup>College of Materials Science and Engineering, Ocean University of China, Qingdao, 266100, China*

\*Corresponding Author: [mengxiangchao@ouc.edu.cn](mailto:mengxiangchao@ouc.edu.cn)

**Number of pages: 36**

**Number of figures: 26**

**Number of tables: 5**

**Number of equations: 1**

## Table of Contents

|                       |            |
|-----------------------|------------|
| <b>Figures.....</b>   | <b>S3</b>  |
| <b>Tables .....</b>   | <b>S29</b> |
| <b>Equation .....</b> | <b>S34</b> |

## Figures

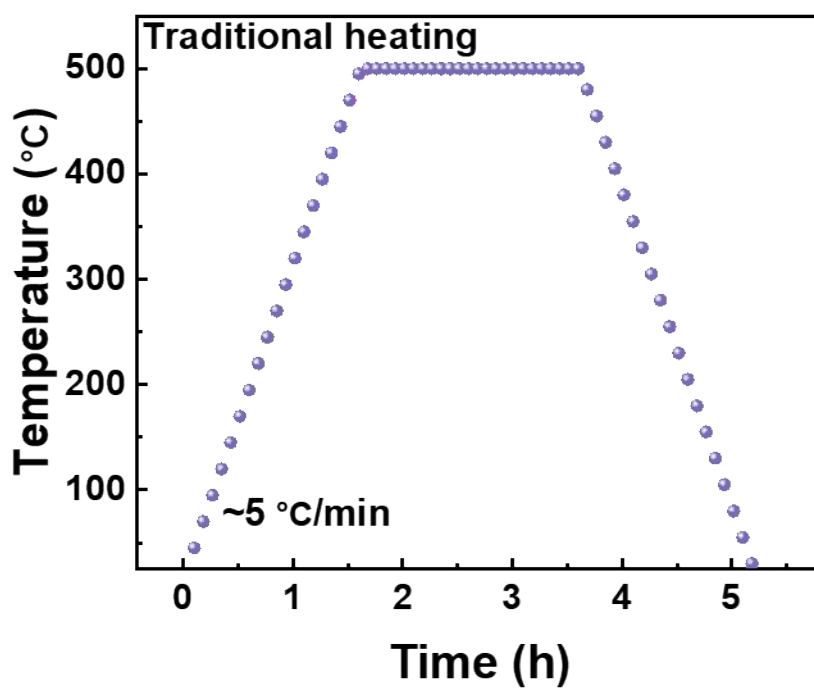

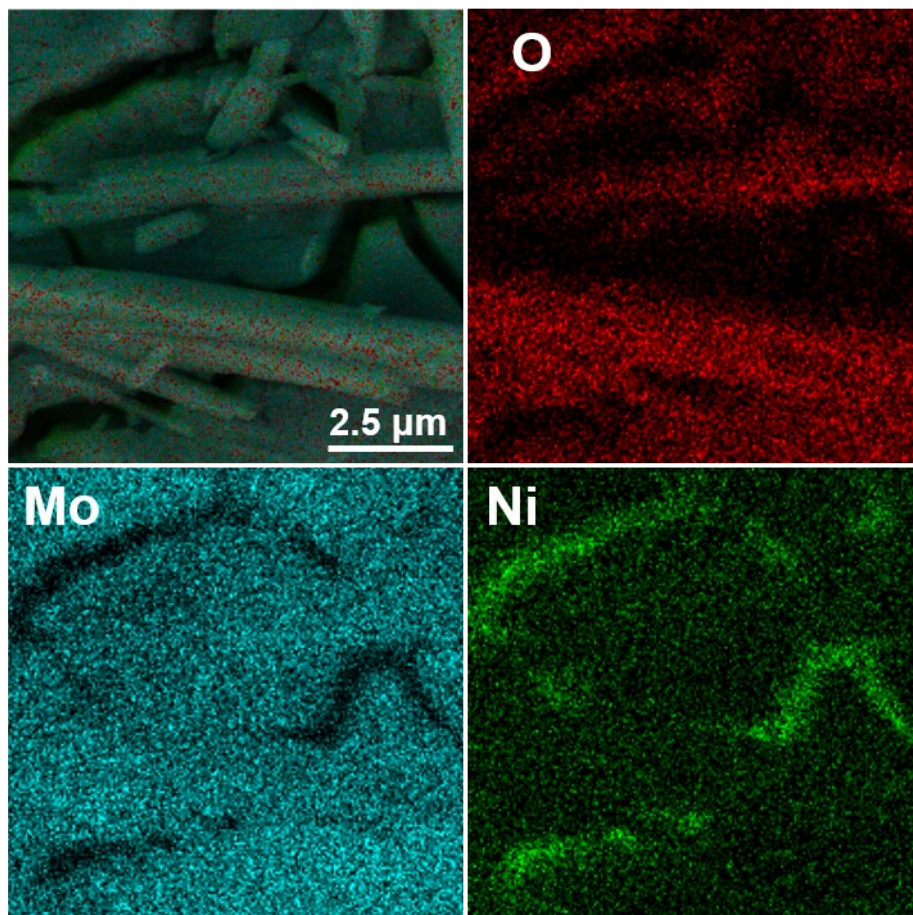

*Fig. S2 The corresponding elemental mapping images for NiMoO<sub>4</sub>.*

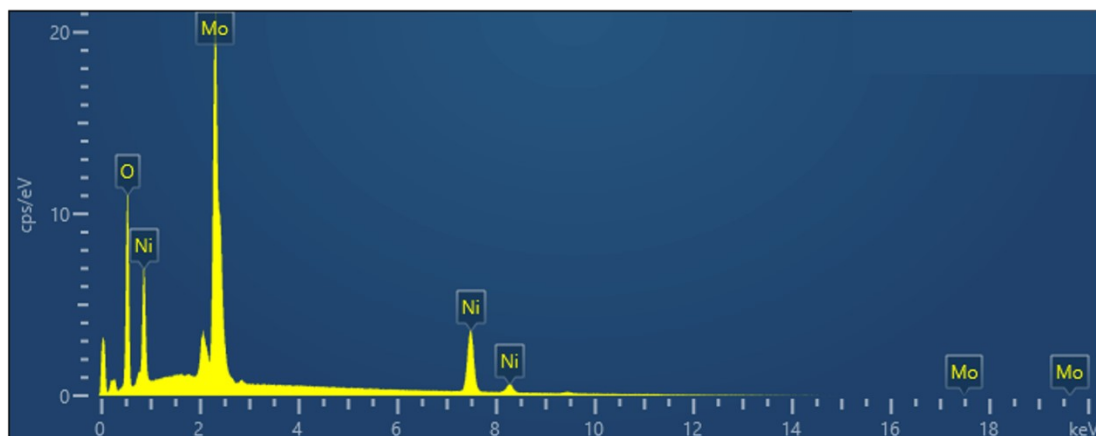

*Fig. S3 EDS analysis of the as-synthesized NiMoO<sub>4</sub>.*

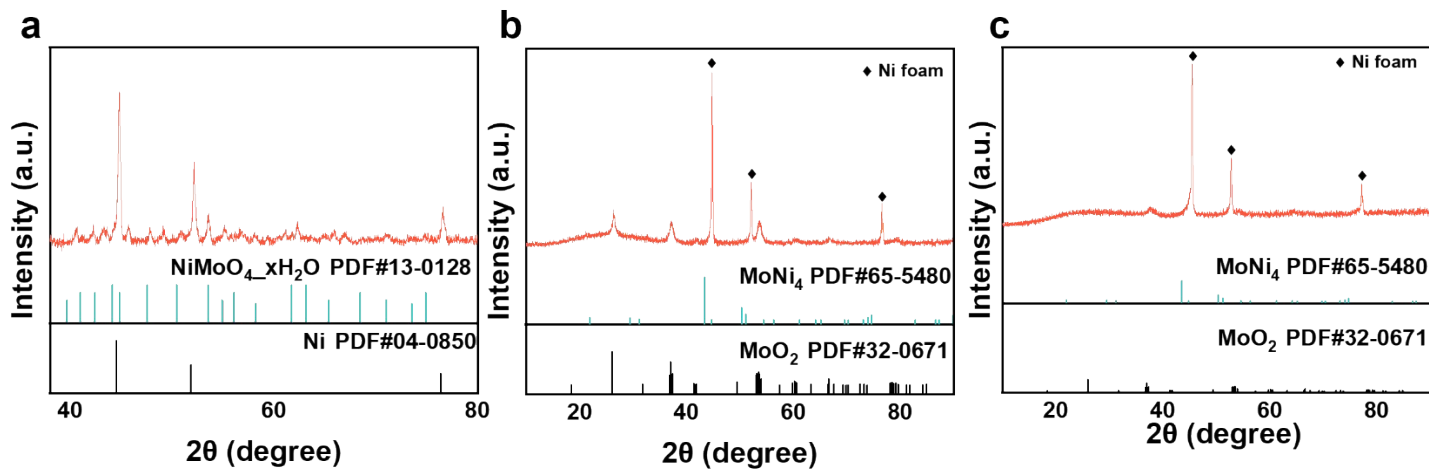

Fig. S4 The XRD patterns of (a)  $\text{NiMoO}_4$ , (b)  $\text{MoNi}_4/\text{MoO}_x$  and (c)  $\text{MoNi}_4/\text{MoO}_x\text{-T}$ .

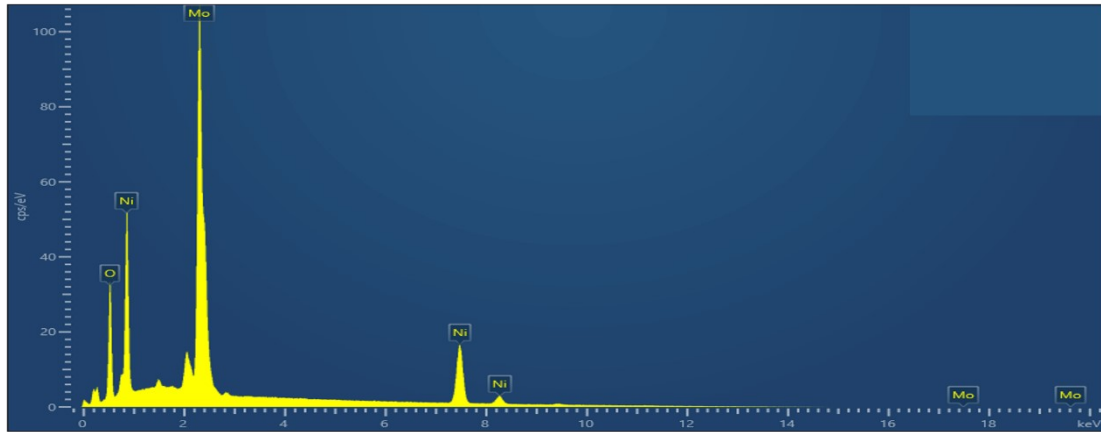

*Fig. S5 EDS analysis of the as-synthesized MoNi<sub>4</sub>/MoO<sub>x</sub>.*

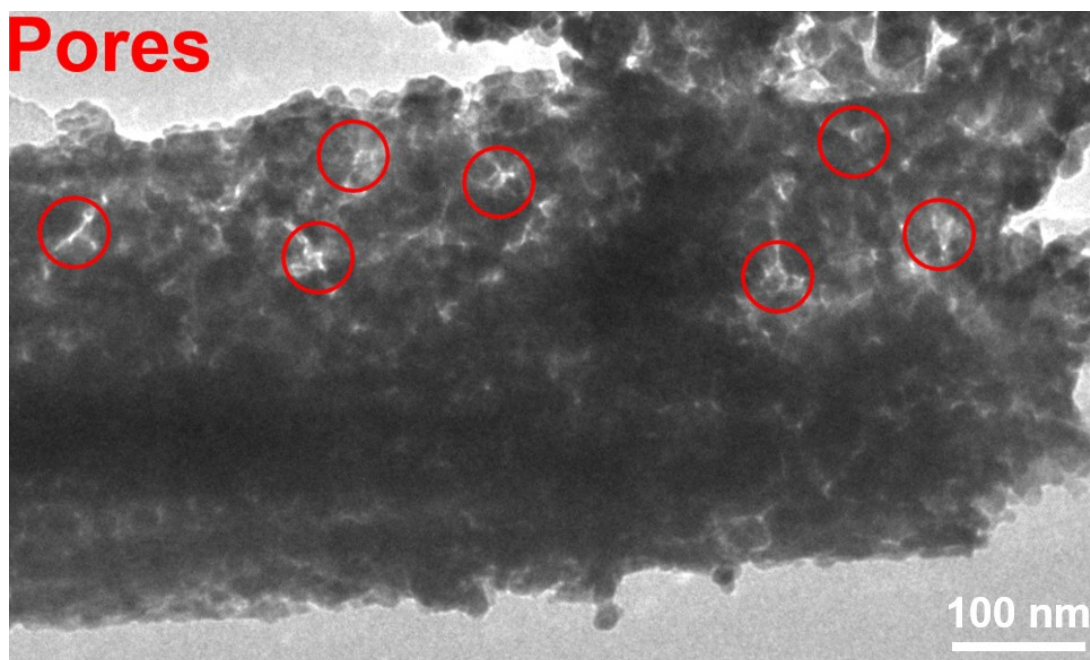

*Fig. S6 TEM of the as-synthesized MoNi<sub>4</sub>/MoO<sub>x</sub>.*



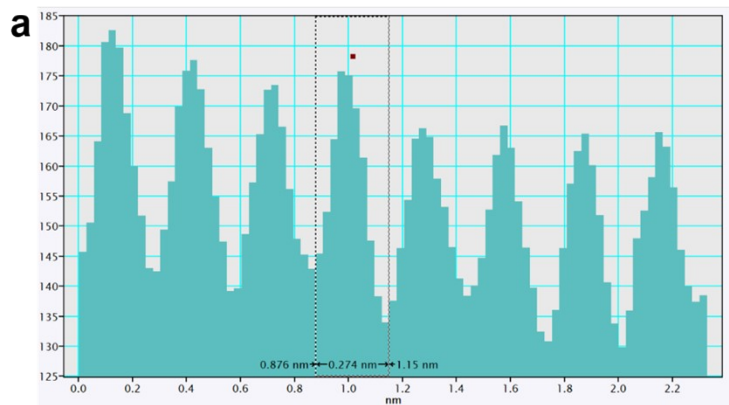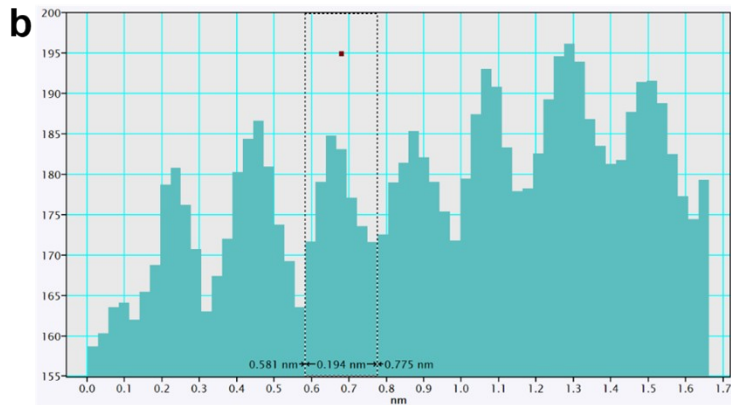

*Fig. S7 The corresponding lattice fringe distance images of MoNi<sub>4</sub>/MoO<sub>x</sub>.*

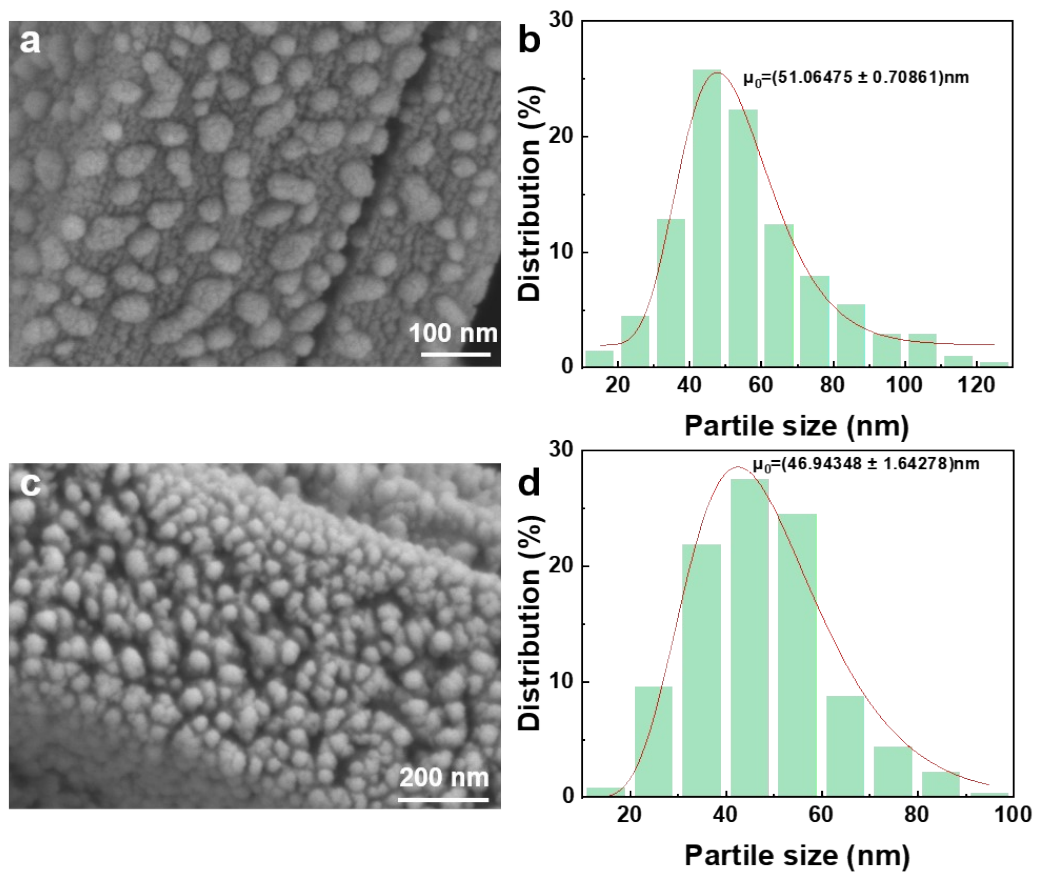

Fig. S8 (a) SEM image of the surface of MoNi<sub>4</sub>/MoO<sub>x</sub>-T and (c) MoNi<sub>4</sub>/MoO<sub>x</sub>, Particle size distribution of MoNi<sub>4</sub> for (b) MoNi<sub>4</sub>/MoO<sub>x</sub>-T and (d) MoNi<sub>4</sub>/MoO<sub>x</sub>.

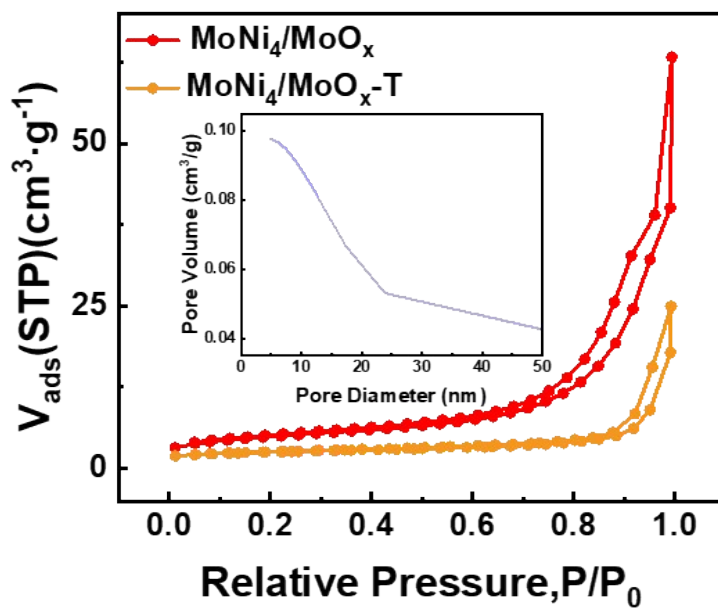

Fig. S9  $N_2$  adsorption-desorption isotherms of  $MoNi_4/MoO_x$  and  $MoNi_4/MoO_x-T$  catalysts, the inset image exhibited the pore size distribution curve of the  $MoNi_4/MoO_x$ .

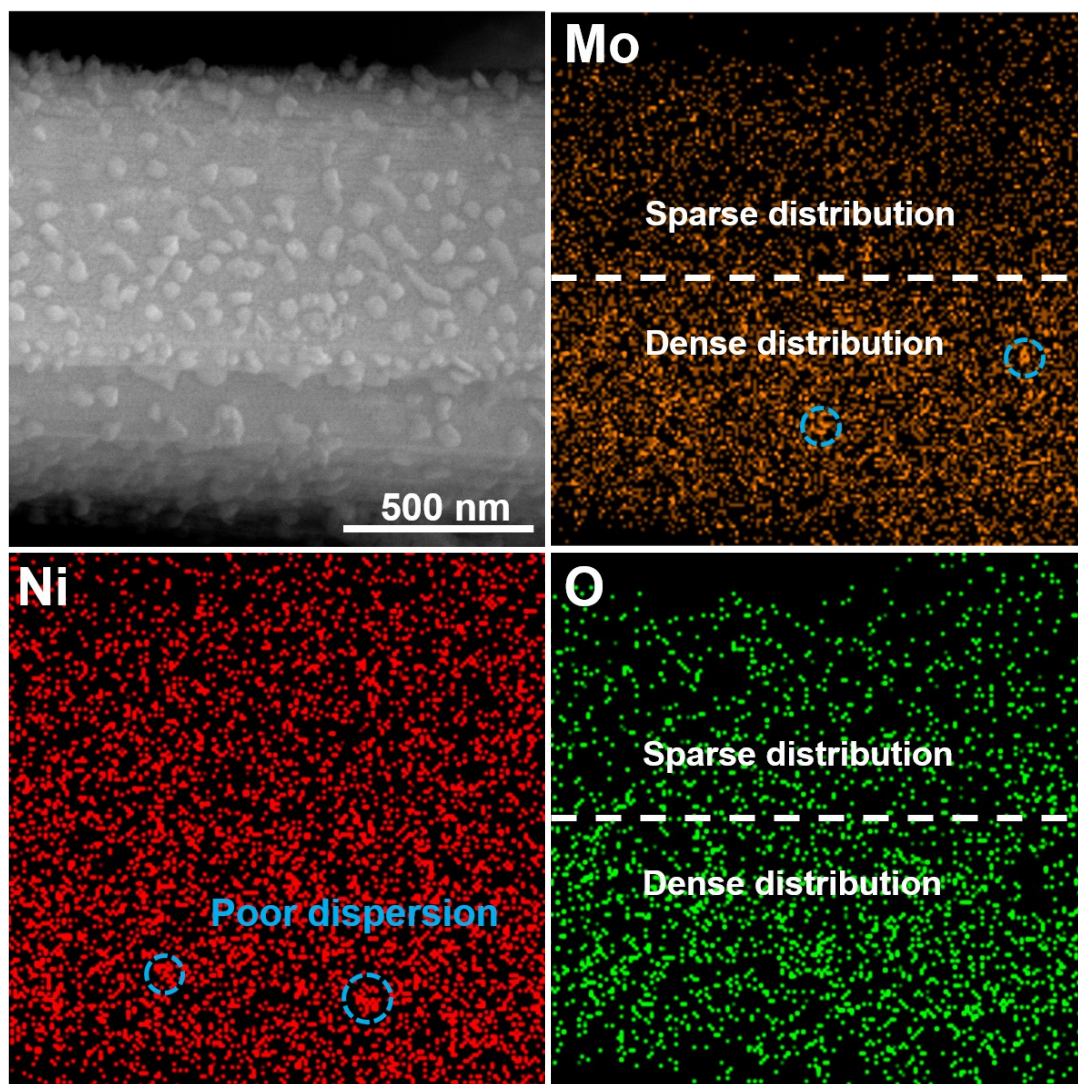

Fig. S10 The corresponding elemental mapping images for  $\text{MoNi}_4/\text{MoO}_x\text{-T}$ .

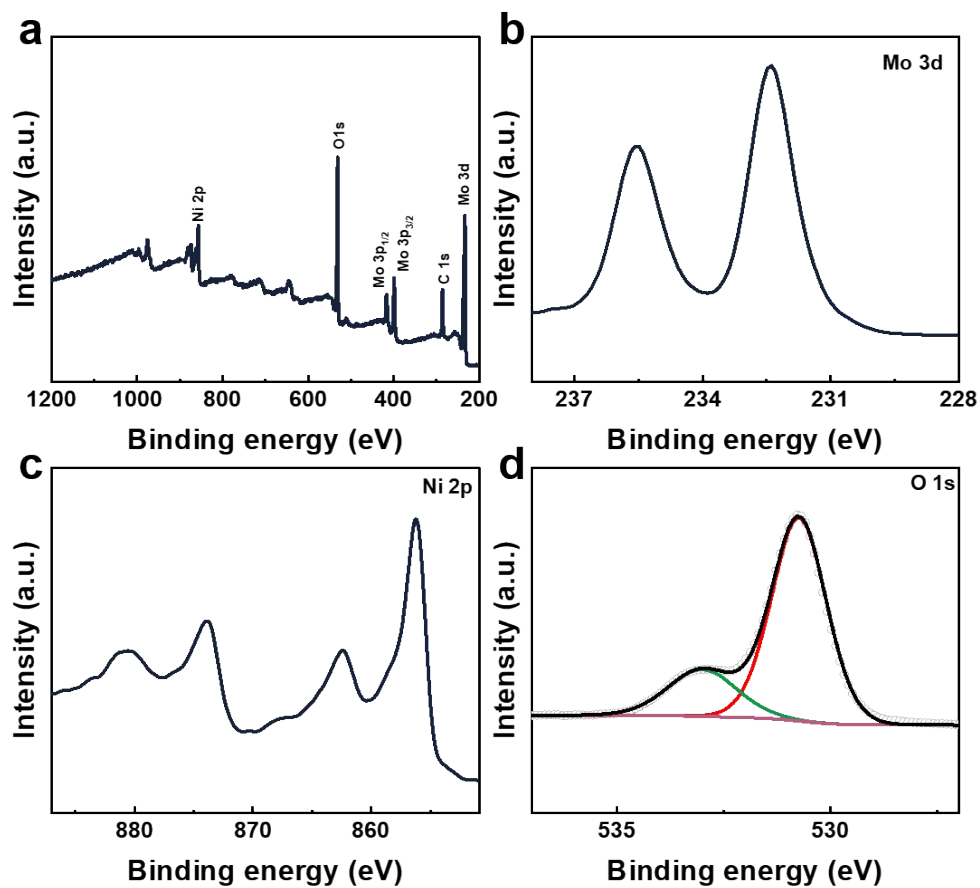

Fig. S11 XPS survey spectrum of NiMoO<sub>4</sub>: (a) XPS survey spectra; (b) Mo 3d; (c) Ni 2p and (d) O 1s.

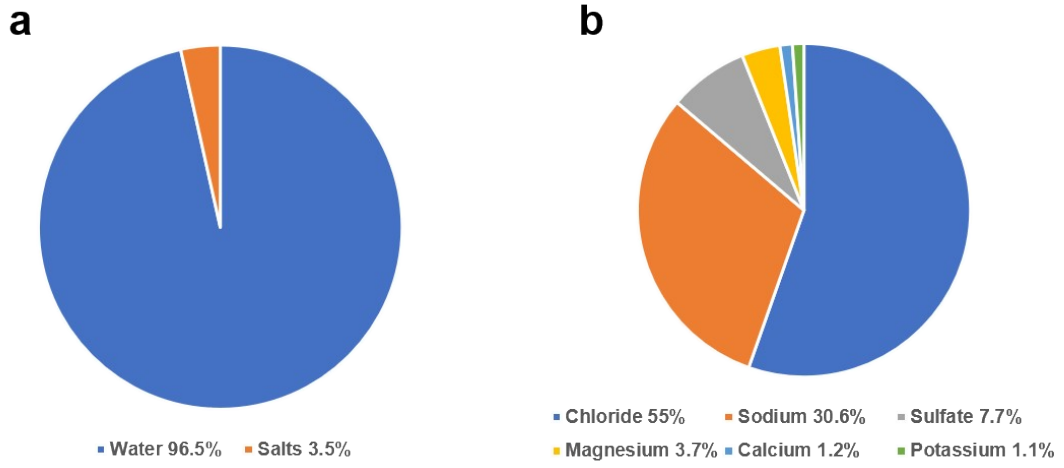

*Fig. S12 The composition of the (a) seawater and (b) salts.*

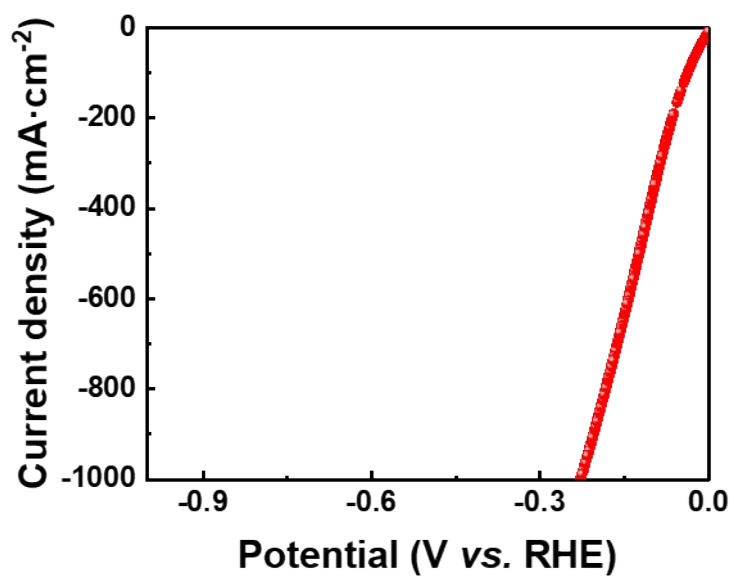

*Fig. S13 LSV curves of the MoNi<sub>4</sub>/MoO<sub>x</sub>.*

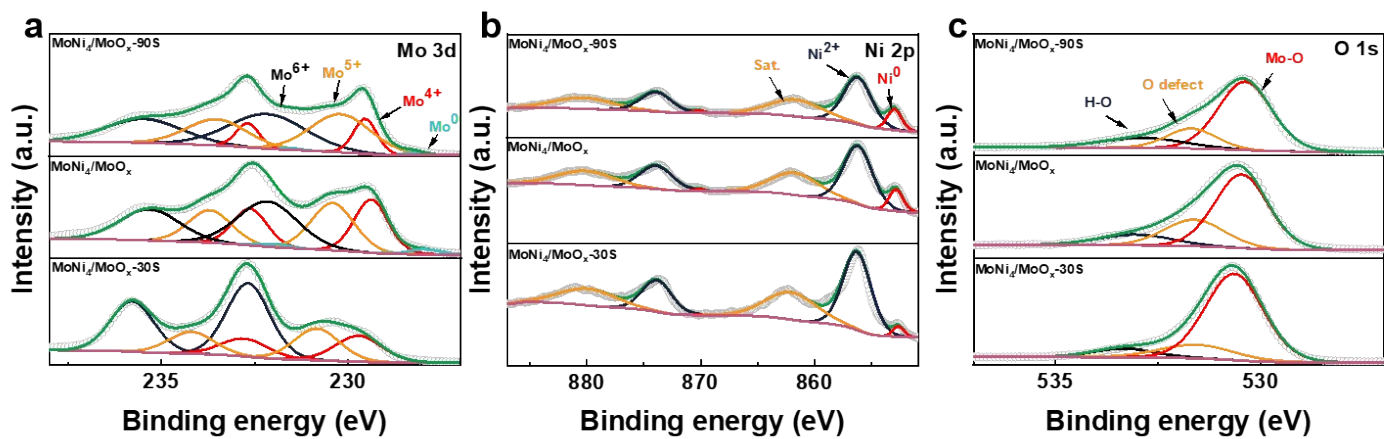

Fig. S14 XPS survey spectrum of MoNi<sub>4</sub>/MoO<sub>x</sub>-30s, MoNi<sub>4</sub>/MoO<sub>x</sub> and MoNi<sub>4</sub>/MoO<sub>x</sub>-90s: (a) Mo 3d; (b) Ni 2p; (c) O 1s.



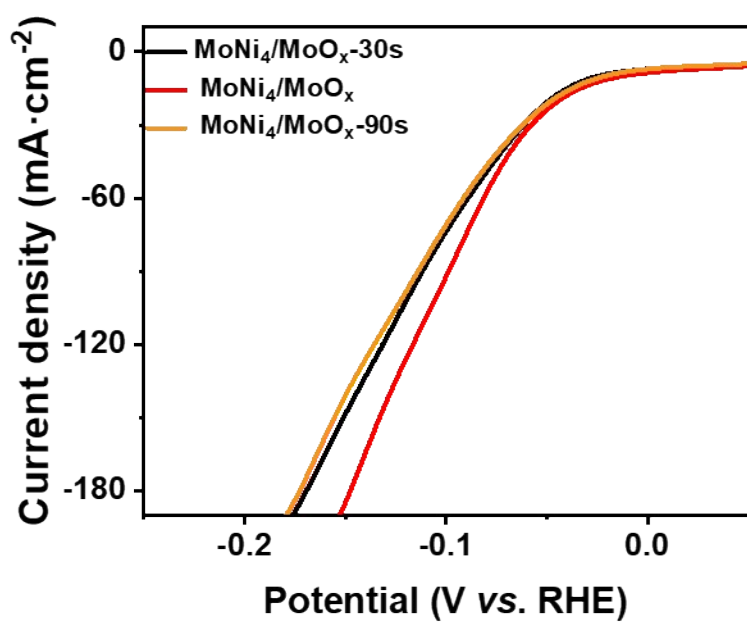

Fig. S15 LSV curves of the MoNi<sub>4</sub>/MoO<sub>x</sub>, MoNi<sub>4</sub>/MoO<sub>x</sub>-30s, MoNi<sub>4</sub>/MoO<sub>x</sub>-90s.

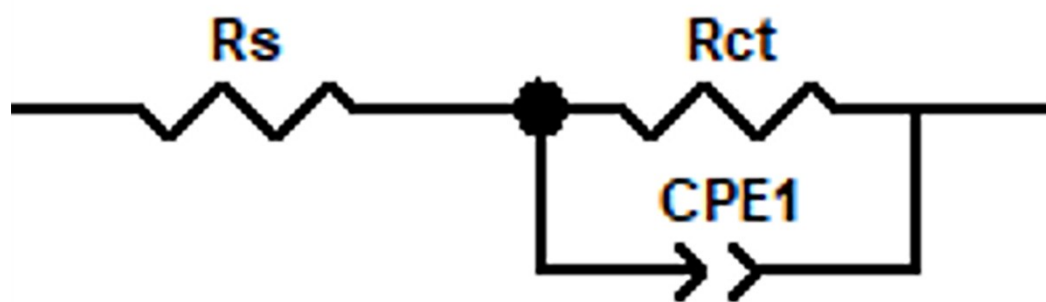

*Fig. S16 The fitted circuit diagram*

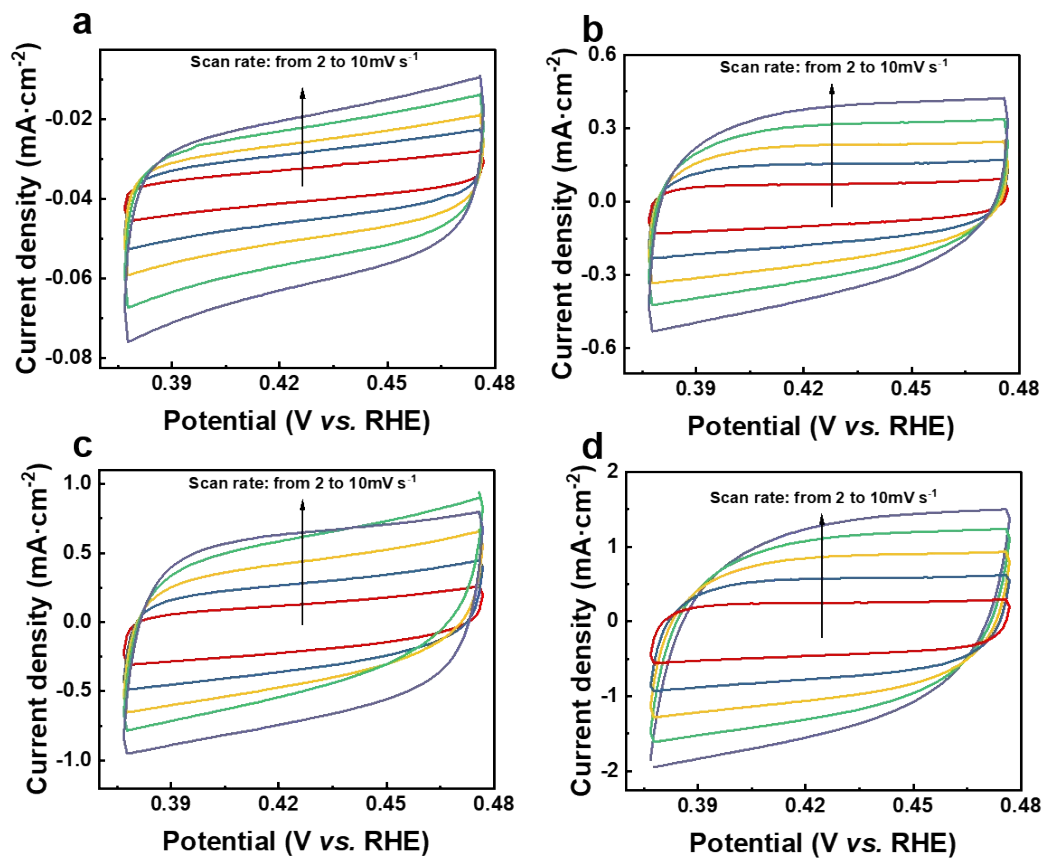

Fig. S17 CV curves within a non-faradaic region at different scan rates toward for (a) Ni@NF, (b) Mo@NF, (c) MoNi<sub>4</sub>/MoO<sub>x</sub>-T and (d) MoNi<sub>4</sub>/MoO<sub>x</sub> in alkaline seawater electrolyte.

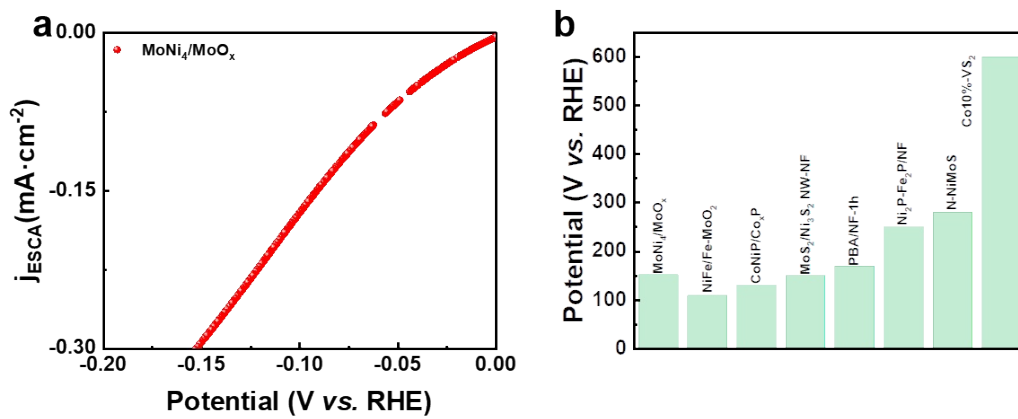

Fig. S18 (a) ESCA-normalized LSV curves of  $\text{MoNi}_4/\text{MoO}_x$ , (b) Comparison of the ESCA-normalized specific activities at current density of  $-0.3 \text{ mA}\cdot\text{cm}^{-2}$  for  $\text{MoNi}_4/\text{MoO}_x$  and other state-of-the-art electrocatalysts.

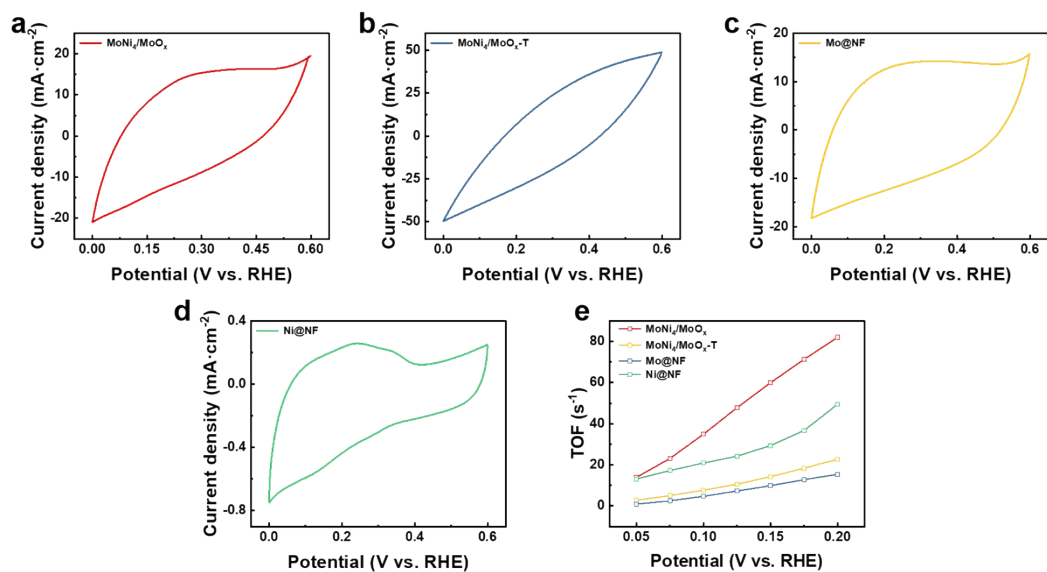

Fig. S19 CV curves of the (a) MoNi<sub>4</sub>/MoO<sub>x</sub>, (b) MoNi<sub>4</sub>/MoO<sub>x</sub>-T, (c) Mo@NF and (d) Ni@NF in the alkaline seawater (pH 14) recorded at scan rate of 50 mV s<sup>-1</sup>. (e) Comparison of the TOFs of MoNi<sub>4</sub>/MoO<sub>x</sub>, MoNi<sub>4</sub>/MoO<sub>x</sub>-T, Mo@NF and Ni@NF.

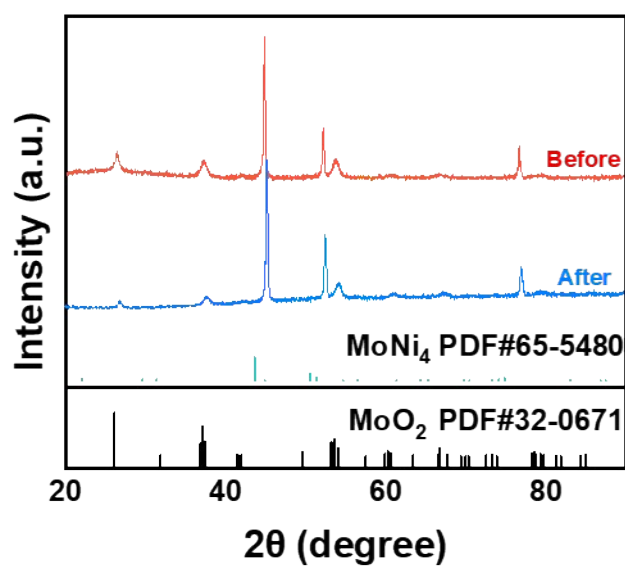

Fig. S20 The XRD patterns of MoNi<sub>4</sub>/MoO<sub>x</sub> after 1h electrolysis at 1 A cm<sup>-2</sup>.

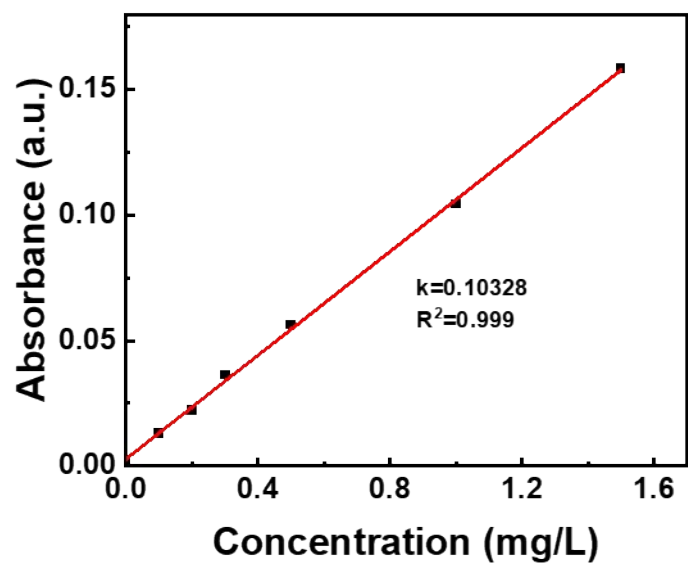

*Fig. S21 Standard curve for hypochlorite species.*

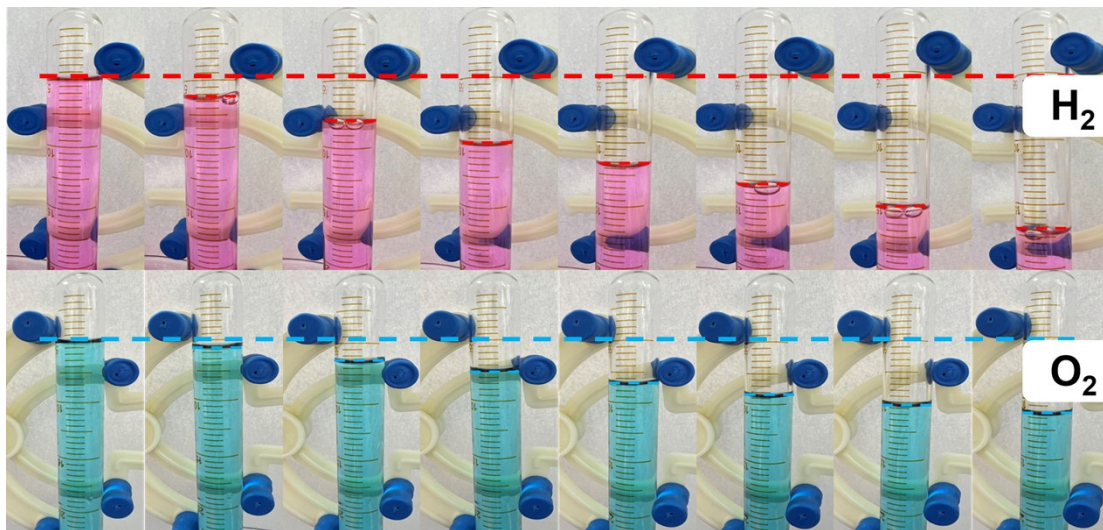

*Fig. S22 Photographs of H<sub>2</sub> and O<sub>2</sub> collected at different time points in alkaline seawater electrolyte.*



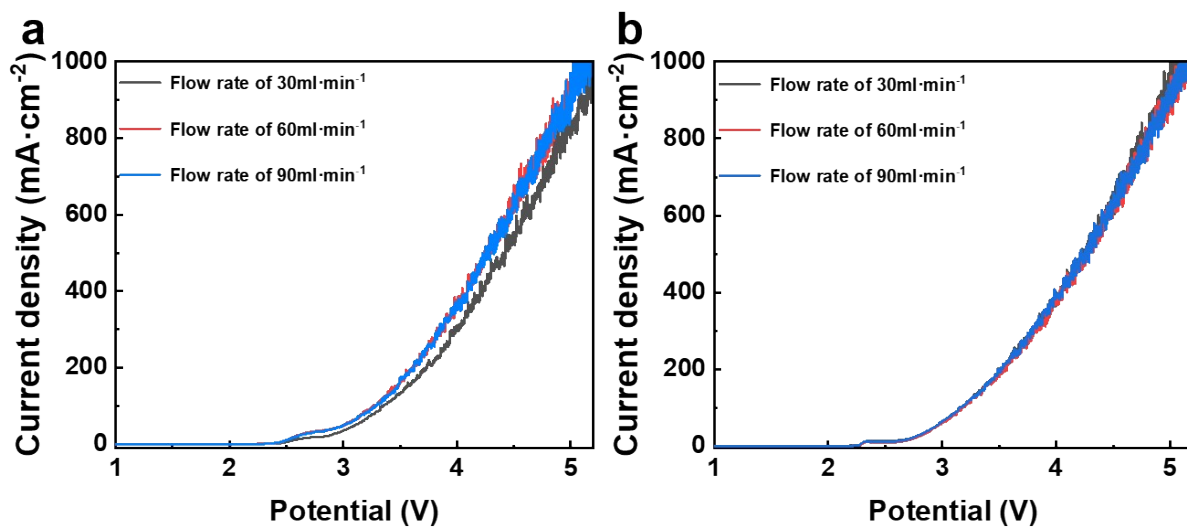

Fig. S23 LSV curves of the (a) Ni foam // Ni foam and (b) MoNi<sub>4</sub>/MoO<sub>x</sub> // Ni foam under different flow rates.

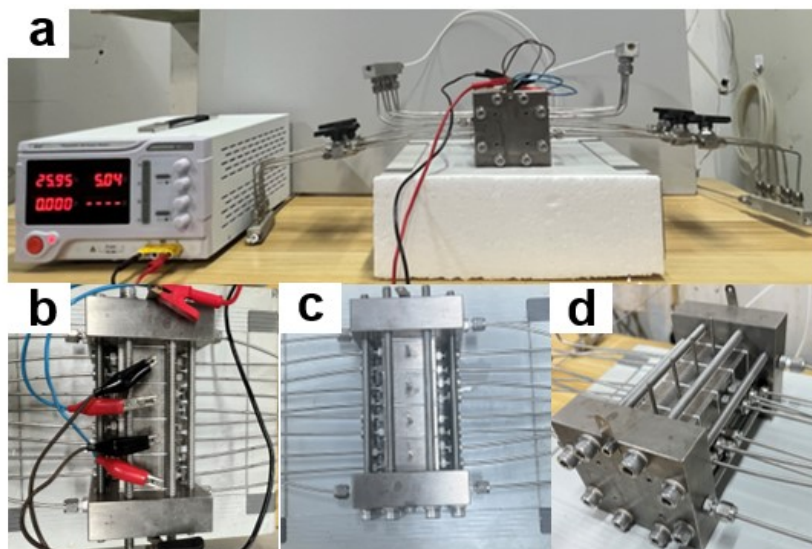

*Fig. S24 (a) A photo of the five stacks of commercial hydrogen generator with DC motor. (b) Top view of the five stacks of commercial hydrogen generator. (c) Top view and (d) side view of the five stacks of commercial hydrogen generator without wire.*

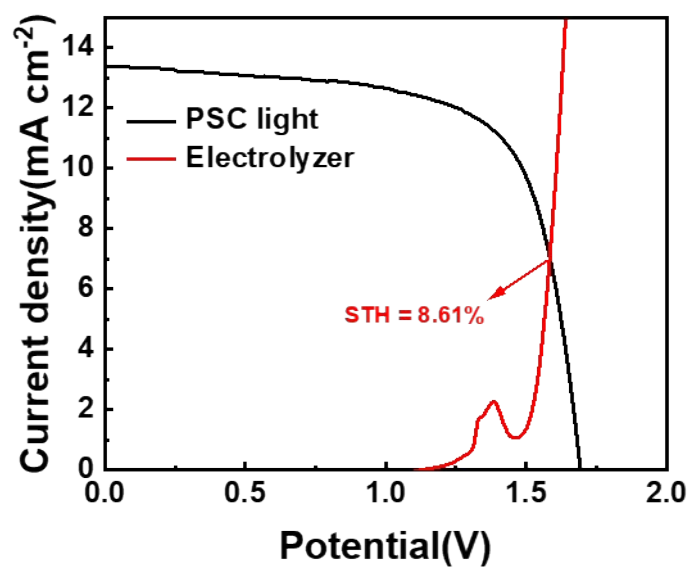

Fig. S25 Current density–potential curve of the alkaline seawater electrolyzer and tandem solar cells under simulated AM 1.5-G  $100 \text{ mW}\cdot\text{cm}^{-2}$  illumination.

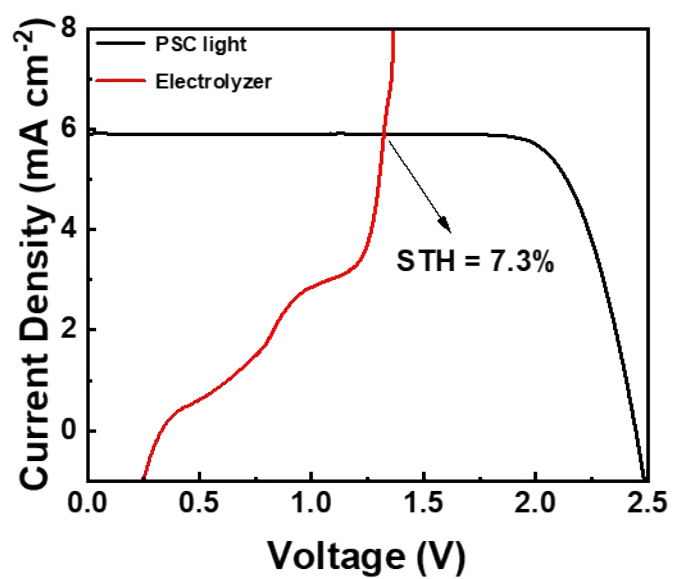

Fig. S26 Current density–potential curve of the alkaline seawater electrolyzer and silicon solar cells under simulated AM 1.5-G  $100 \text{ mW}\cdot\text{cm}^{-2}$  illumination.

## Tables

Table S1 Comparison of the ESCA-normalized specific activities at current density of  $-0.3 \text{ mA}\cdot\text{cm}^{-2}$  for  $\text{MoNi}_4/\text{MoO}_x$  and other state-of-the-art electrocatalysts.

| Samples                                             | Overpotential (mV)                               | Ref |
|-----------------------------------------------------|--------------------------------------------------|-----|
| $\text{MoNi}_4/\text{MoO}_x$                        | 152                                              | -   |
| $\text{NiFe}/\text{Fe}-\text{MoO}_2$                | $\sim 110 @ -0.15 \text{ mA}\cdot\text{cm}^{-2}$ | [1] |
| $\text{Ni}_2\text{P}-\text{Fe}_2\text{P}/\text{NF}$ | $\sim 250$                                       | [2] |
| $\text{Co}10\%-\text{VS}_2$                         | $\sim 600$                                       | [3] |
| $\text{MoS}_2/\text{Ni}_3\text{S}_2$<br>NW-NF       | $\sim 150 @ -0.2 \text{ mA}\cdot\text{cm}^{-2}$  | [4] |
| N-NiMoS                                             | $\sim 280$                                       | [5] |
| PBA/NF-1h                                           | $\sim 170$                                       | [6] |
| $\text{CoNiP}/\text{Co}_x\text{P}$                  | $\sim 130 @ -0.05 \text{ mA}\cdot\text{cm}^{-2}$ | [7] |

Table S2 HER parameters of as-prepared samples.

| <b>Samples</b>                         | <b>Number of active sites (<math>\times 10^{21} \text{ m}^{-2}</math>)</b> | <b>TOF (<math>\text{s}^{-1}</math>) at 100 mV</b> |
|----------------------------------------|----------------------------------------------------------------------------|---------------------------------------------------|
| MoNi <sub>4</sub> /MoO <sub>x</sub>    | 332.3                                                                      | 34.86                                             |
| MoNi <sub>4</sub> /MoO <sub>x</sub> -T | 558.7                                                                      | 7.64                                              |
| Mo@NF                                  | 351.6                                                                      | 4.70                                              |
| Ni@NF                                  | 9.6                                                                        | 20.88                                             |

*Table S3 Absorbance and corresponding content of hypochlorite.*

| <b>Used cathode</b>                 | <b>Absorbance</b> | <b>Content (mg/L)</b> |
|-------------------------------------|-------------------|-----------------------|
| Without electrolysis                | 0.084             | 0.78447               |
| MoNi <sub>4</sub> /MoO <sub>x</sub> | 0.085             | 0.79415               |
| NF                                  | 0.202             | 1.92699               |

*Table S4 Power consumption per unit of hydrogen production (kW·h/m<sup>3</sup>) in different voltages among 20 °C.*

| <b>Samples</b>                                 | <b>2.01 V</b> | <b>2.21 V</b> | <b>2.37 V</b> | <b>2.51 V</b> |
|------------------------------------------------|---------------|---------------|---------------|---------------|
| Ni foam // Ni foam                             | 8.60          | 8.24          | 7.78          | 8.89          |
| MoNi <sub>4</sub> /MoO <sub>x</sub> // Ni foam | 6.73          | 5.92          | 5.24          | 5.56          |



*Table S5 Power consumption per unit of hydrogen production (kW·h/m<sup>3</sup>) in different voltages among 20 °C.*

| <b>Samples</b>                                 | <b>2.75 V</b> | <b>3.00 V</b> | <b>3.25 V</b> | <b>3.50 V</b> | <b>3.75 V</b> | <b>4.00 V</b> |
|------------------------------------------------|---------------|---------------|---------------|---------------|---------------|---------------|
| Ni foam // Ni foam                             | 6.35          | 6.84          | 7.37          | 8.02          | 8.26          | 8.99          |
| MoNi <sub>4</sub> /MoO <sub>x</sub> // Ni foam | 6.18          | 6.51          | 7.01          | 7.42          | 7.90          | 8.37          |

## Equation

**Calculation of Power consumption per unit of hydrogen production:**

$$W_{H_2} = \frac{IUT}{Q_{H_2} * 10^3} \quad \text{Equation S1}$$

Where  $W_{H_2}$  is the hydrogen production electricity consumption,  $I$  and  $U$  are the current and voltage in the electrolyzer, the  $T$  is time and the  $Q_{H_2}$  is the amount of the hydrogen production.

## References

- [1] W. Shi, J. Zhu, L. Gong, D. Feng, Q. Ma, J. Yu, H. Tang, Y. Zhao, S. Mu, Fe-Incorporated Ni/MoO<sub>2</sub> Hollow Heterostructure Nanorod Arrays for High-Efficiency Overall Water Splitting in Alkaline and Seawater Media, *Small*, 18 (2022) e2205683.
- [2] L. Wu, L. Yu, F. Zhang, B. McElhenny, D. Luo, A. Karim, S. Chen, Z.J.A.F.M. Ren, Heterogeneous bimetallic phosphide Ni<sub>2</sub>P-Fe<sub>2</sub>P as an efficient bifunctional catalyst for water/seawater splitting, *Small*, 31 (2021) 2006484.
- [3] M. Zhao, M. Yang, W. Huang, W. Liao, H. Bian, D. Chen, L. Wang, J. Tang, C.J.C. Liu, Synergism on electronic structures and active edges of metallic vanadium disulfide nanosheets via Co doping for efficient hydrogen evolution reaction in seawater, *Small*, 13 (2021) 2138-2144.
- [4] S. Xue, Z. Liu, C. Ma, H.-M. Cheng, W.J.S.B. Ren, A highly active and durable electrocatalyst for large current density hydrogen evolution reaction, *Small*, 65 (2020) 123-130.
- [5] C. Huang, L. Yu, W. Zhang, Q. Xiao, J. Zhou, Y. Zhang, P. An, J. Zhang, Y.J.A.C.B.E. Yu, N-doped Ni-Mo based sulfides for high-efficiency and stable hydrogen evolution reaction, *Small*, 276 (2020) 119137.
- [6] Y. Wang, D. Jia, W. Zhang, G. Jia, H. Xie, W. Ye, G. Zhu, P.J.C.C. Gao, A boronization-induced amorphous–crystalline interface on a Prussian blue analogue for efficient and stable seawater splitting, *Small*, 58 (2022) 6132-6135.

[7] D. Liu, H. Ai, M. Chen, P. Zhou, B. Li, D. Liu, X. Du, K.H. Lo, K.W. Ng, S.P.J.S. Wang, Multi-phase heterostructure of CoNiP/Co<sub>x</sub>P for enhanced hydrogen evolution under alkaline and seawater conditions by promoting H<sub>2</sub>O dissociation, 17 (2021) 2007557.
